# Supplementary material for: Bubble-propelled plasmon-reinforced Pt-ZnIn2S4 micromotors for stirring-free photocatalytic water purification
Source: Royal Society of Chemistry journal article supplement (doi:10.1039/d2qi01291j), 2022-01-01
Supplement: d2qi01291j1.pdf [file d2qi01291j1.pdf]

## Supporting Information

---

### **Bubble-Propelled Plasmon-Reinforced Pt-ZnIn<sub>2</sub>S<sub>4</sub> Micromotors for Stirring-Free Photocatalytic Water Purification**

Mengge Yuan, Mengqin Gong, Hai Huang, Yu Zhao, Yulong Ying\*, and Sheng Wang\*

School of Materials Science and Engineering, Zhejiang Sci-Tech University, Hangzhou,  
310018, P. R. China.

E-mail: [yingyulong@zstu.edu.cn](mailto:yingyulong@zstu.edu.cn); wangsheng571@hotmail.com

\*Corresponding author

## Supporting Information

### Contents

#### Supporting Figures

**Figure S1.** SEM images of the pristine ZIS microspheres at different magnifications.

**Figure S2.** EDS spectrum of the Pt-ZIS micromotors.

**Figure S3.** HRTEM images illustrate the presence of ZIS and Pt NPs on the Pt-ZIS micromotors.

**Figure S4.** Statistical velocity distribution of the Pt-ZIS micromotors in 1, 3, 5, and 10 wt% H<sub>2</sub>O<sub>2</sub> aqueous solutions (1 wt% SDS).

**Figure S5.** Motion characterization of the Pt-ZIS micromotors.

**Finger S6.** The UV-Vis absorption spectra of MO and TCH aqueous solution at different concentrations.

**Figure S7.** Time-dependent digital photographs of MO aqueous solution treated by Pt-ZIS micromotors at the best condition (8-Pt-ZIS||H<sub>2</sub>O<sub>2</sub>+Vis).

**Figure S8.** SEM images and XRD patterns of three cycles of MO degradation by Pt-ZIS.

**Figure S9.** Band alignment structure for Pt and ZIS before contact and after contact.

**Figure S10.** EPR spectra and photodegradation efficiencies with different scavengers.

#### Supporting Table

**Table S1.** The current techniques in the preparation of bubble-propelled micromotors.

#### Supporting Movies

**Movie S1.** Motion behavior of Pt-ZIS MNMs in pure water.

**Movie S2.** Motion behavior of Pt-ZIS MNMs in different concentrations of H<sub>2</sub>O<sub>2</sub> and 1 wt% SDS.

**Movie S3.** Motion behavior of Pt-ZIS MNMs in 5 wt% H<sub>2</sub>O<sub>2</sub> without SDS.

**Movie S4.** Motion behavior of Pt-ZIS MNMs in pure water with/without light.

**Movie S5.** Motion behavior of Pt-ZIS MNMs in simulated polluted water.

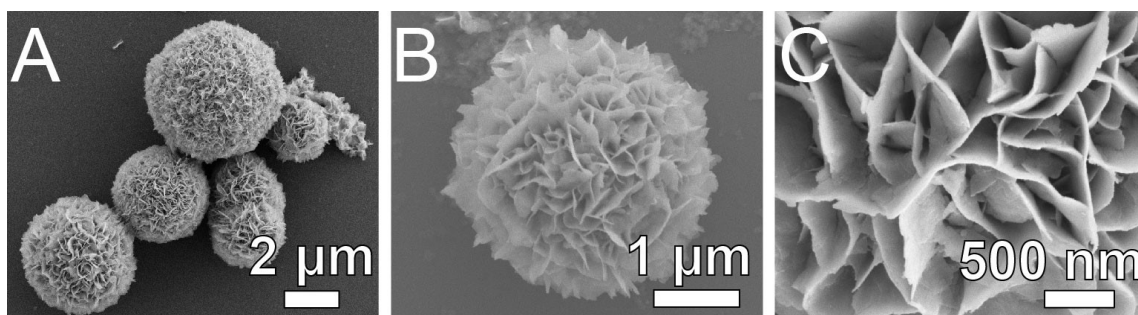

**Figure S1.** SEM images of the pristine ZIS microspheres at different magnifications.

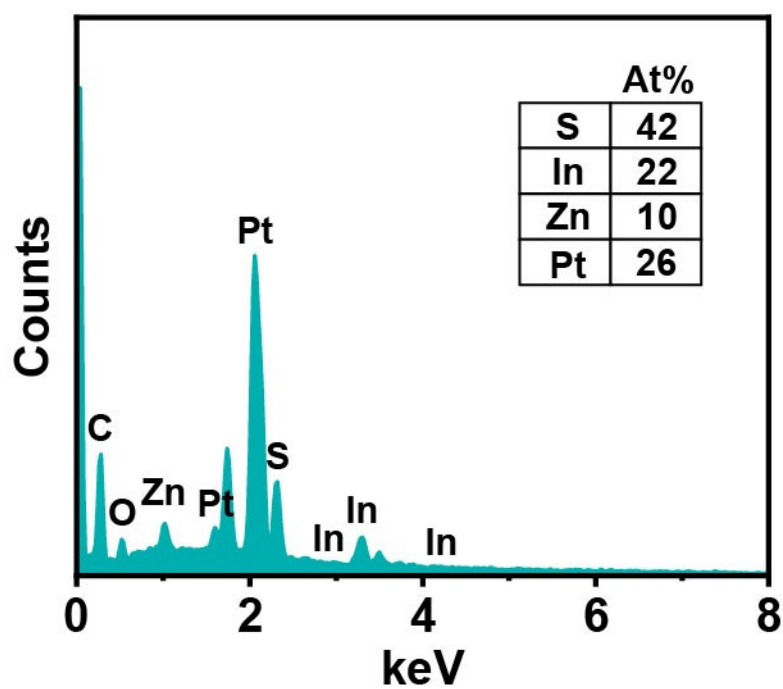

**Figure S2.** EDS spectrum of the Pt-ZIS micromotors.

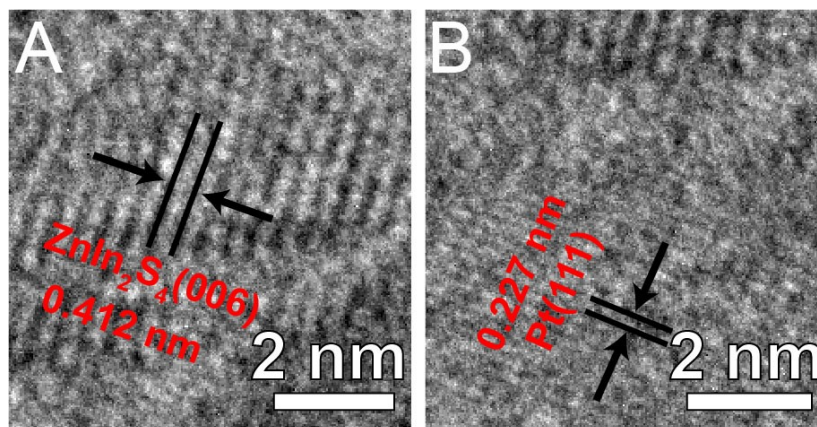

**Figure S3.** HRTEM images illustrate the presence of (A) ZIS and (B) Pt NPs on the Pt-ZIS micromotors.

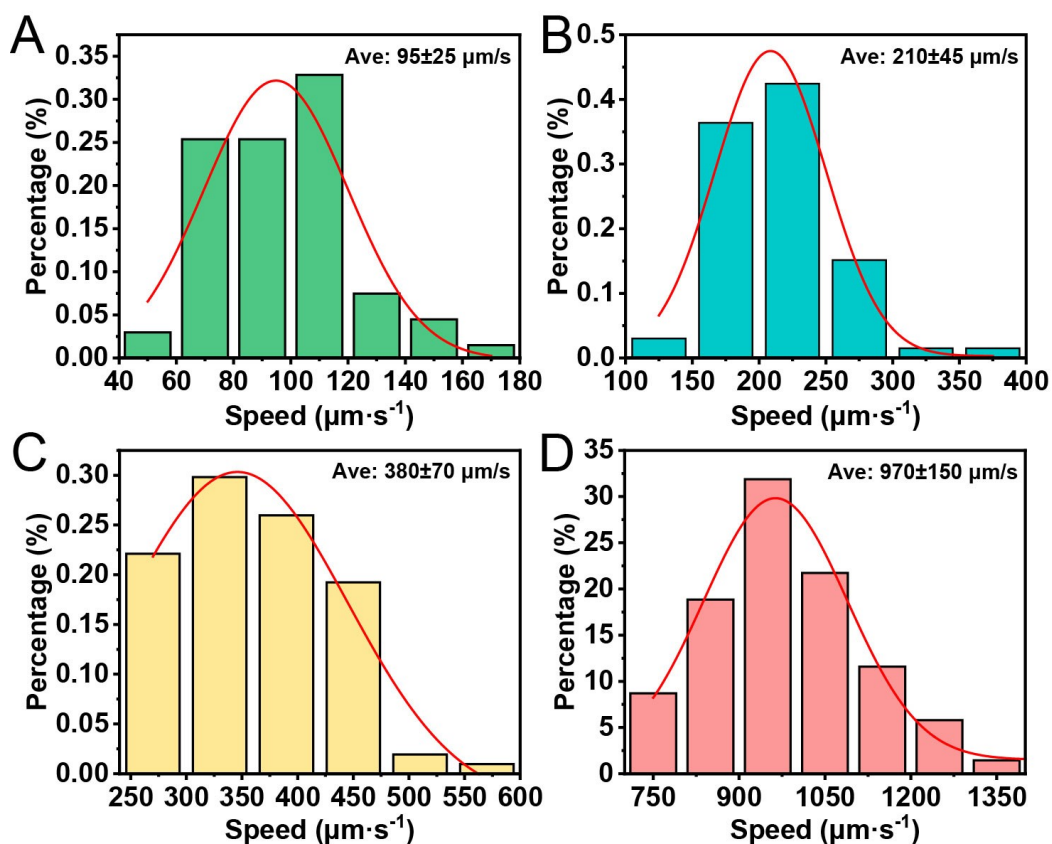

**Figure S4.** Statistical velocity distribution of the Pt-ZIS micromotors in (A) 1 wt% H<sub>2</sub>O<sub>2</sub>, (B) 3 wt% H<sub>2</sub>O<sub>2</sub>, (C) 5 wt% H<sub>2</sub>O<sub>2</sub>, (D) 10 wt% H<sub>2</sub>O<sub>2</sub> aqueous solution (1 wt% SDS). The results were calculated from 50 representative micromotors under different conditions.

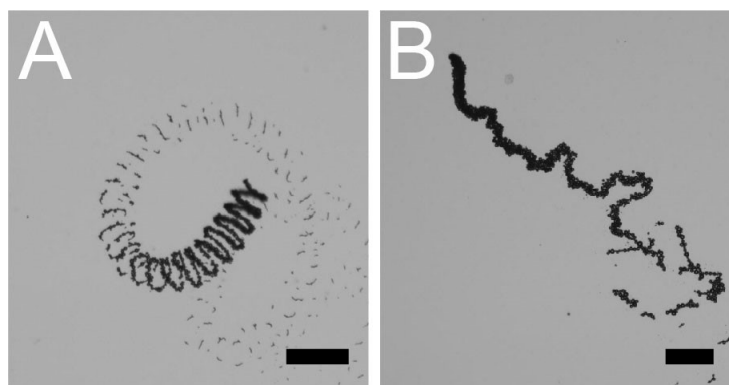

**Figure S5.** Motion characterization of the Pt-ZIS micromotors. (A) Present spiral and (B) curve propulsion (5 wt%  $\text{H}_2\text{O}_2$ ). Scale bar, 200  $\mu\text{m}$ .

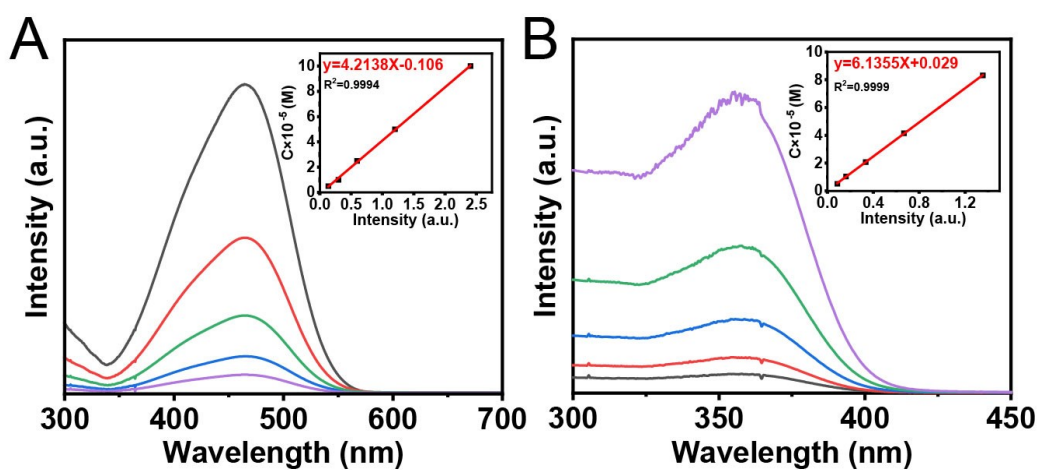

**Figure S6.** The UV-Vis absorption spectra of (A) MO and (B) TCH aqueous solution at different concentrations. The insets are the corresponding standard calibrated curve of absorbance-concentration.

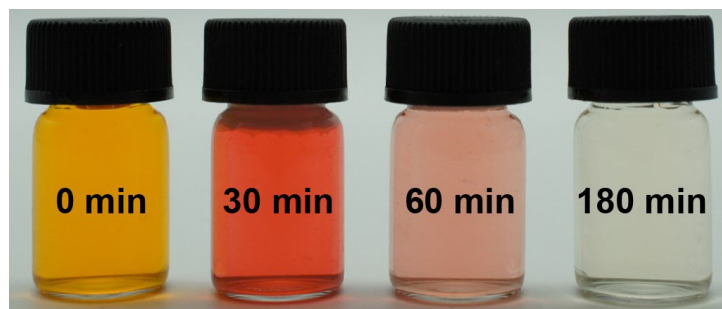

**Figure S7.** Time-dependent digital photographs of MO aqueous solution treated by Pt-ZIS micromotors at the best condition (8-Pt-ZIS||H<sub>2</sub>O<sub>2</sub>+Vis). The color change from orange to red is due to the addition of H<sub>2</sub>O<sub>2</sub>.

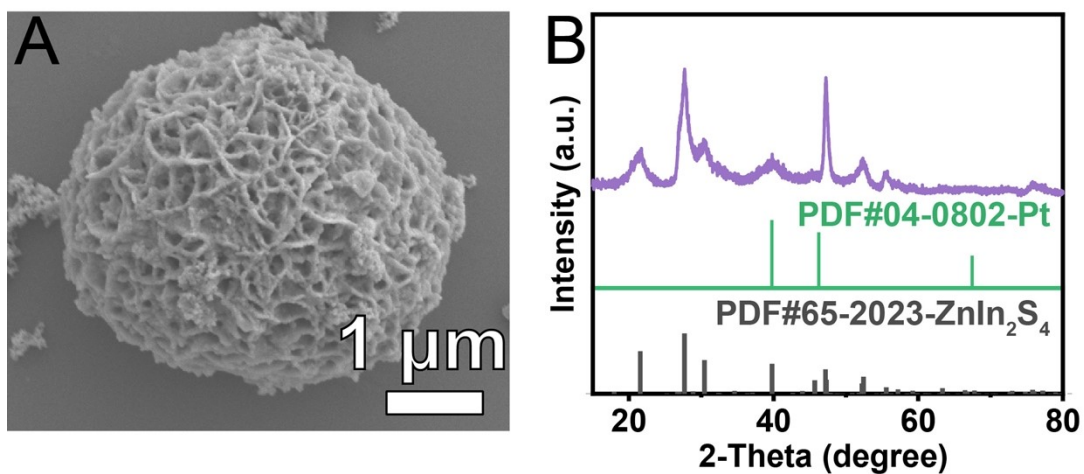

**Figure S8.** (A) SEM images and (B) XRD patterns of Pt-ZIS micromotors after three cycles of MO degradation test.

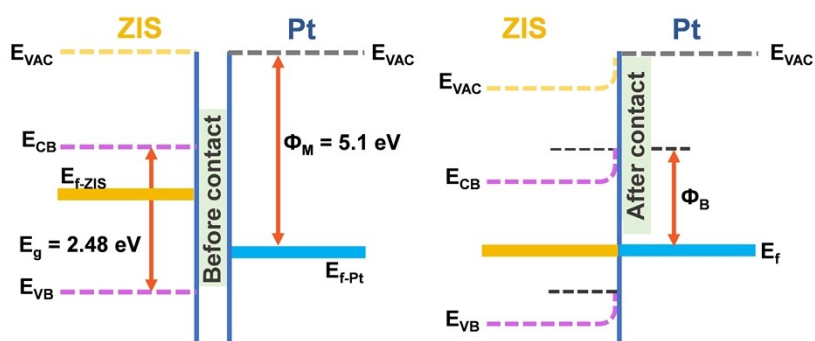

**Figure S9.** Band alignment structure for Pt and ZIS before contact and after contact.

$\Phi_M$  — work function of Pt,  $\Phi_B$  — Schottky barrier,  $E_{VB}$  — Valance band energy  $E_{CB}$  — Conduction band energy,  $E_f$  — Fermi level energy,  $E_{vac}$  — Vacuum energy level.

The loading Pt NPs on the surface of ZIS can effectively reduce the charge recombination at interfaces and surfaces. The relationship between the absolute electron potential of an electrode ( $E_{abs}$ ) and the standard electrode potential ( $E^\theta$ ) is expressed as follows:<sup>1</sup>

$$E_{abs} = -E^\theta - 4.44 \quad (\text{at } 298 \text{ K}) \quad (1)$$

According to the conversion formula, the valence band and conduction band potential of ZIS are equivalent to -6.04 eV and -3.56 eV in the vacuum level ( $E_{vac}$ ). Since the Fermi level of platinum ( $E_f = -5.1$  eV)<sup>2</sup> is lower and more negative to the conduction band of ZIS, the excited electrons move more easily from the CB of the semiconductor to the Fermi level of the Pt after contact. The as-built Schottky barrier ( $\Phi_B$ ) at a metal-semiconductor junction inhibits the exciton recombination process.<sup>3</sup>

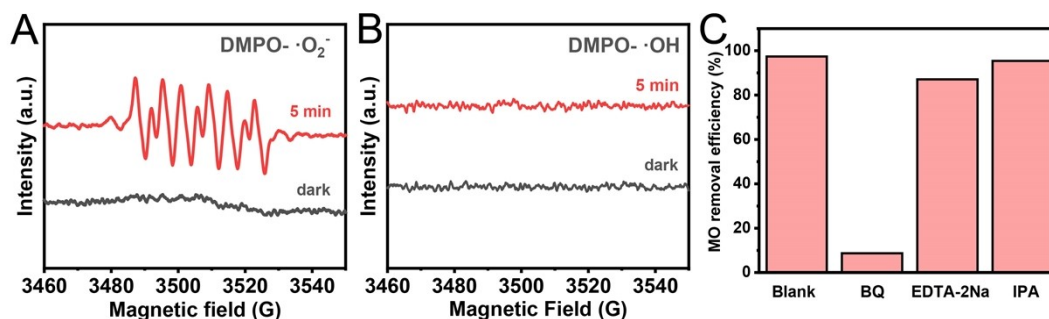

**Figure S10.** EPR spectra of (A) DMPO-•O<sub>2</sub><sup>-</sup> and (B) DMPO-•OH adducts in the photocatalytic systems of Pt-ZIS after 5 min irradiation of the visible light, (C) MO photodegradation efficiencies with different scavengers. (BQ: 1 mM, EDTA-2Na: 1 mM, and IPA: 1 wt%)

**Table S1.** The current techniques in the preparation of bubble-propelled micromotors

| Bubble-Propelled Micromotors                          | Preparation Method                    | Condition and Instruments                                                                                                                                                                        | Ref.      |
|-------------------------------------------------------|---------------------------------------|--------------------------------------------------------------------------------------------------------------------------------------------------------------------------------------------------|-----------|
| Pt-ZnIn <sub>2</sub> S <sub>4</sub> Micromotors       | UV photoreduction deposition method   | Reduction of H <sub>2</sub> PtCl <sub>6</sub> ·6H <sub>2</sub> O by ultraviolet light (XPA series photochemical reactor)                                                                         | This work |
| S-CuFC/Ni/Pt Janus micromotors                        | Physical deposition                   | S-CuFC particles were evenly dispersed across the PVP layer to form a monolayer, Pt (50 nm) is deposited on top of it (E-beam evaporator (Korea Vacuum Tech) and sputter (A&E Korea))            | S4        |
| Pt/TiO <sub>2</sub> Microrobots                       | High vacuum sputtering coating method | Pt metal was deposited on TiO <sub>2</sub> particles in a high vacuum condition (Leica EM ACE600 sputter coater)                                                                                 | S5        |
| TiO <sub>2</sub> -Pt Micromotor                       | Physical sputtering method            | A single layer of TiO <sub>2</sub> particles was dropped on the slide, and a platinum layer was sputtered on top (HHV-TF500 E-beam evaporator)                                                   | S6        |
| SiO <sub>2</sub> -Pt <sub>np</sub> Janus Microspheres | Physical sputtering method            | Sputtering Pt of 10 nm on a monolayer of SiO <sub>2</sub> spheres in a chamber prefilled with Ar, operating at a vacuum level of 6.77 × 10 <sup>-3</sup> Torr; (Leica EM ACE600 sputter coater)  | S7        |
| ZnO/Pt Micromotors                                    | Physical vapor deposition method      | Pt was evaporated from Pt slug (99.99% purity) using an e-beam evaporator with a current of 130 mA and a voltage of 9 kV at a pressure of 1 × 10 <sup>-6</sup> mbar. (Electron-beam evaporation) | S8        |
| Cu/Pt Micromotors                                     | electrochemical deposition            | A layer of copper is deposited on top of the polycarbonate template, and the Pt segment was electrodeposited subsequently at -2 mA for 600 s (Autolab type III electrochemical analyzer)         | S9        |
| MIMS/Pt Janus Micromotors                             | sputtering method                     | A single layer of magnetic illite microspheres (MIMSs) was tiled on the slide, and Pt was sputtered in the direction vertical to the glass slide (Mini-sputter, MCM-100P, SEC, South Korea)      | S10       |



### References

- S1. W. J. Chun, A. Ishikawa, H. Fujisawa, T. Takata, J. N. Kondo, M. Hara, M. Kawai, Y. Matsumoto and K. Domen, Conduction and valence band positions of Ta<sub>2</sub>O<sub>5</sub>, TaON, and Ta<sub>3</sub>N<sub>5</sub> by UPS and electrochemical methods, *J. Phys. Chem. B*, 2003, **107**, 1798-1803.
- S2. T. S. Tofa, F. Ye, K. L. Kunjali and J. Dutta, Enhanced visible light photodegradation of microplastic fragments with plasmonic platinum/zinc oxide nanorod photocatalysts, *Catalysts*, 2019, **9**, 819.
- S3. A. M. Pourrahimi, K. Villa, C. L. Manzanares Palenzuela, Y. Ying, Z. Sofer and M. Pumera, Catalytic and light-driven ZnO/Pt janus nano/micromotors: switching of motion mechanism via interface roughness and defect tailoring at the nanoscale, *Adv. Funct. Mater.*, 2019, **29**, 1808678.
- S4. J. Hwang, H. M. Yang, K. W. Lee, Y. I. Jung, K. J. Lee and C. W. Park, A remotely steerable Janus micromotor adsorbent for the active remediation of Cs-contaminated water, *J. Hazard. Mater.*, 2019, **369**, 416-422.
- S5. C. M. Oral, M. Ussia, D. K. Yavuz and M. Pumera, Shape Engineering of TiO<sub>2</sub> Microrobots for “On-the-Fly” Optical Brake, *Small*, 2022, **18**, 2106271.
- S6. Z. Xiao, S. Duan, P. Xu, J. Cui, H. Zhang and W. Wang, Synergistic speed enhancement of an electric-photochemical hybrid micromotor by tilt rectification, *ACS Nano*, 2020, **14**, 8658-8667.
- S7. X. Lyu, X. Liu, C. Zhou, S. Duan, P. Xu, J. Dai, X. Chen, Y. Peng, D. Cui, J. Tang, X. Ma, and W. Wang, Active, yet little mobility: Asymmetric decomposition of H<sub>2</sub>O<sub>2</sub> is not sufficient in propelling catalytic micromotors, *J. Am. Chem. Soc.*, 2021, **143**, 12154-12164.
- S8. A. M. Pourrahimi, K. Villa, Y. Ying, Z. Sofer and M. Pumera, ZnO/ZnO<sub>2</sub>/Pt Janus micromotors propulsion mode changes with size and interface structure: enhanced nitroaromatic explosives degradation under visible light, *ACS Appl. Mater. Interfaces*, 2018, **10**, 42688-42697.
- S9. J. G. S. Moo, S. Presolski and M. Pumera, Photochromic spatiotemporal control of bubble-propelled micromotors by a spiropyran molecular switch, *ACS Nano*, 2016,

**10**, 3543-3552.

S10. C. W. Park, T. Kim, H. M. Yang, Y. Lee and H. J. Kim, Active and selective removal of Cs from contaminated water by self-propelled magnetic illite microspheres, *J. Hazard. Mater.*, 2021, **416**, 126226.
